# Supplementary material
Source: Springer Nature journal article supplement (https://www.springermedizin.de/resource/supplementary/12943_2014_1323_MOESM10_ESM.pdf/9552722)

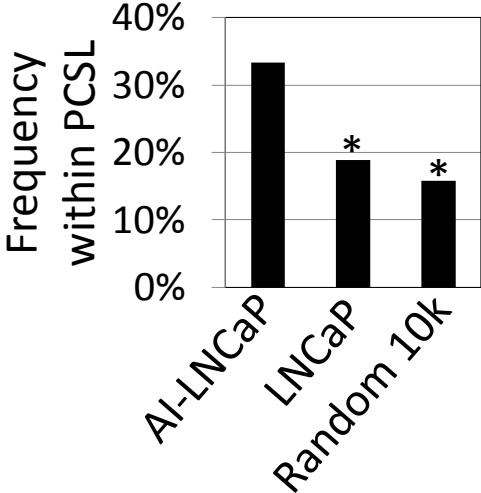

Supplement: MOESM10 [file 9552722]
